# Supplementary material for: Relationship between Urine Creatinine and Urine Osmolality in Spot Samples among Men and Women in the Danish Diet Cancer and Health Cohort
Source: MDPI journal article supplement (doi:10.3390/toxics9110282), 2021-11-01
Supplement: s1 [file s1]

# Supplementary Materials: Relationship between Urine Creatinine and Urine Osmolality in Spot Samples among Men and Women in the Danish Diet Cancer and Health Cohort

Selinay Ozdemir, Clara G. Sears, James M. Harrington, Aslak Harbo Poulsen, Jessie Buckley, Channele J. Howe, Katherine A. James, Anne Tjønneland, Gregory A. Wellenius, Ole Raaschou-Nielsen and Jaymie Meliker

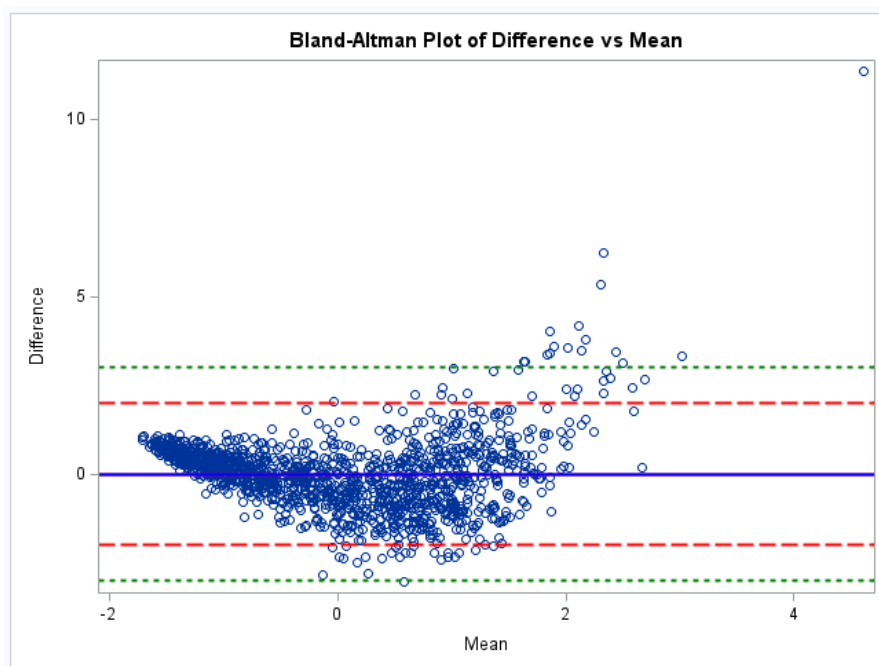

(a)

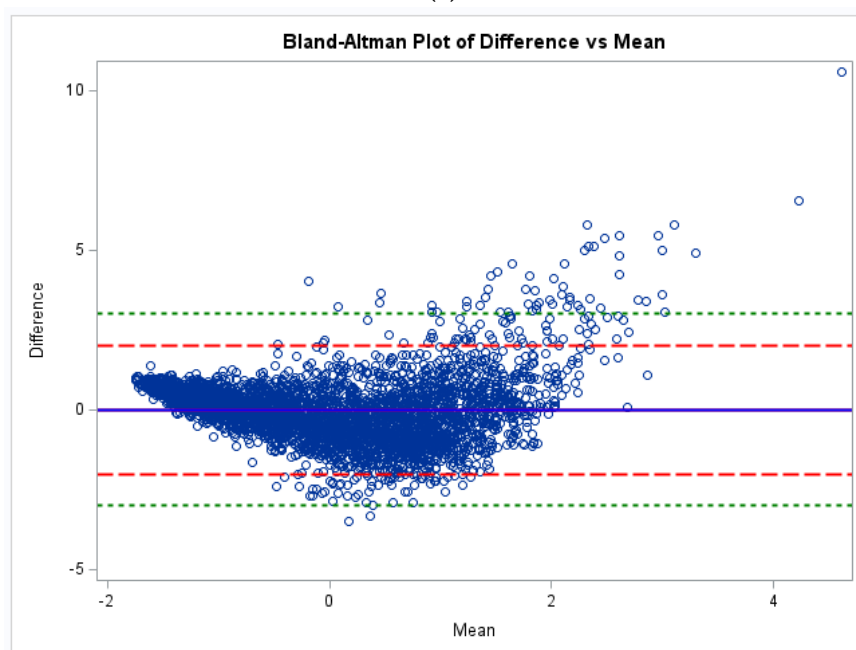

(b)

**Figure S1.** Bland-Altman Plot of the Difference between Osmolality and Creatinine Vs the Mean of Osmolality and Creatinine. Standardized with Z-Scores. (a) Subcohort. (b) Case-Cohort Study Population.

As the mean of creatinine and osmolality increases, the difference between the two values also increases, suggesting less similarity between the values at higher values of creatinine and osmolality.

**Table S1.** Characteristics of the Case-Cohort Study Population.

|                          | N (%)      | Median, 25 <sup>th</sup> –75 <sup>th</sup> %iles:<br>Cr, mg/L | Median, 25 <sup>th</sup> –75 <sup>th</sup> %iles:<br>Osmolality, mOsm |
|--------------------------|------------|---------------------------------------------------------------|-----------------------------------------------------------------------|
| Case-Cohort Study Sample |            |                                                               |                                                                       |
| All                      | 3731 (100) | 1020 (481–1650)                                               | 591 (327–788)                                                         |
| Men                      | 1991 (53)  | 1330 (764–1890)                                               | 690.5 (440–848)                                                       |
| Women                    | 1740 (47)  | 685 (326–1280)                                                | 448 (247–699)                                                         |
| Age 50–<60               | 2525 (68)  | 1050 (504–1670)                                               | 610 (343–802)                                                         |
| Age 60–64                | 1206 (32)  | 948 (423–1590)                                                | 551 (299–759)                                                         |
| Diabetes at baseline     | 129 (3)    | 891 (426–1370)                                                | 643 (443–779)                                                         |
| Current Smoker           | 683 (18)   | 981 (461–1700)                                                | 550 (304–768)                                                         |
| Never Smoker             | 3048 (81)  | 1020 (487–1640)                                               | 602 (335–794)                                                         |
| BMI < 25                 | 1306 (35)  | 865 (378–1470)                                                | 499 (265–746)                                                         |
| BMI 25–30                | 1610 (43)  | 1090 (526–1700)                                               | 620 (354–799)                                                         |
| BMI ≥ 30                 | 815 (22)   | 1150 (573–1720)                                               | 659 (402–824)                                                         |
| Incident Case Population |            |                                                               |                                                                       |
| AMI thru 2015            | 985 (26)   | 1080 (530–1680)                                               | 615 (355–808)                                                         |
| HF thru 2015             | 1135 (30)  | 1030 (480–1650)                                               | 610 (340–783)                                                         |
| Stroke thru 2009         | 709 (19)   | 1020 (480–1630)                                               | 567 (335–782)                                                         |
| Diabetes thru 2012       | 814 (22)   | 1090 (570–1680)                                               | 658 (395–814)                                                         |

**Table S2.** Correlation coefficients between creatinine and osmolality in the subcohort and the case-cohort study sample.

|                           | Subcohort                                   |                                         | Case-cohort study sample                    |                                         |
|---------------------------|---------------------------------------------|-----------------------------------------|---------------------------------------------|-----------------------------------------|
|                           | Spearman coefficient<br>( $\rho$ ), 95% CIs | Pearson coefficient<br>( $r$ ), 95% CIs | Spearman coefficient<br>( $\rho$ ), 95% CIs | Pearson coefficient<br>( $r$ ), 95% CIs |
| All                       | 0.90 (0.89–0.91)                            | 0.82 (0.80–0.84)                        | 0.87 (0.87–0.88)                            | 0.79 (0.78–0.80)                        |
| Men                       | 0.84 (0.81–0.86)                            | 0.79 (0.77–0.82)                        | 0.82 (0.81–0.84)                            | 0.77 (0.75–0.78)                        |
| Women                     | 0.92 (0.91–0.93)                            | 0.81 (0.78–0.83)                        | 0.90 (0.89–0.90)                            | 0.79 (0.77–0.80)                        |
| Age 50–<60                | 0.90 (0.89–0.91)                            | 0.82 (0.80–0.84)                        | 0.87 (0.86–0.88)                            | 0.79 (0.78–0.81)                        |
| Age 60–64                 | 0.90 (0.87–0.92)                            | 0.81 (0.77–0.84)                        | 0.88 (0.86–0.89)                            | 0.80 (0.78–0.82)                        |
| Diabetes at Baseline      | 0.65 (0.27–0.85)                            | 0.74 (0.43–0.89)                        | 0.73 (0.63–0.80)                            | 0.66 (0.55–0.75)                        |
| No Diabetes at Baseline   | 0.90 (0.89–0.91)                            | 0.82 (0.80–0.84)                        | 0.88 (0.87–0.89)                            | 0.80 (0.79–0.81)                        |
| Current Smoker            | 0.88 (0.84–0.91)                            | 0.81 (0.75–0.85)                        | 0.86 (0.84–0.88)                            | 0.77 (0.73–0.79)                        |
| Never Smoker              | 0.90 (0.89–0.91)                            | 0.82 (0.81–0.84)                        | 0.88 (0.87–0.89)                            | 0.81 (0.79–0.82)                        |
| BMI < 25                  | 0.93 (0.91–0.94)                            | 0.86 (0.84–0.88)                        | 0.90 (0.89–0.91)                            | 0.83 (0.81–0.84)                        |
| BMI 25–30                 | 0.88 (0.86–0.90)                            | 0.83 (0.81–0.86)                        | 0.86 (0.85–0.88)                            | 0.79 (0.77–0.81)                        |
| BMI > 30                  | 0.83 (0.77–0.86)                            | 0.70 (0.63–0.76)                        | 0.83 (0.80–0.85)                            | 0.74 (0.71–0.77)                        |
| Incident Case Populations |                                             |                                         |                                             |                                         |
| AMI thru 2015             | 0.89 (0.82–0.93)                            | 0.83 (0.73–0.89)                        | 0.86 (0.84–0.88)                            | 0.79 (0.76–0.81)                        |
| HF thru 2015              | 0.78 (0.66–0.86)                            | 0.75 (0.62–0.84)                        | 0.86 (0.84–0.87)                            | 0.78 (0.75–0.80)                        |
| Stroke thru 2009          | 0.81 (0.68–0.89)                            | 0.72 (0.55–0.84)                        | 0.86 (0.84–0.88)                            | 0.77 (0.74–0.80)                        |
| Diabetes thru 2012        | 0.78 (0.72–0.83)                            | 0.77 (0.71–0.82)                        | 0.79 (0.76–0.81)                            | 0.72 (0.69–0.75)                        |

95% CIs using Fisher's Z transformation

**Table S3.** Model R<sup>2</sup>, Mean Square Error, and  $\beta$  coefficients of predictor variables selected in lasso procedure in relation to urine osmolality (mOsm) in case-cohort study sample.

|                              | <b>B coefficient<sup>#</sup></b> | <b>Mean Square Error</b> | <b>R<sup>2</sup></b> |
|------------------------------|----------------------------------|--------------------------|----------------------|
| Model 1 and Model 2*         |                                  | 26,721                   | 0.63                 |
| Urine Creatinine (mg/L)      | 0.26                             |                          |                      |
| Model 3                      |                                  | 22,887                   | 0.69                 |
| Urine Creatinine (mg/L)      | 0.17                             |                          |                      |
| Urine Strontium ( $\mu$ g/L) | 0.17                             |                          |                      |
| Urine Cesium ( $\mu$ g/L)    | 12.98                            |                          |                      |
| Urine Thallium ( $\mu$ g/L)  | 277.59                           |                          |                      |

\*Results from Model 2 only showed creatinine associated with osmolality.

#These  $\beta$  coefficients indicate the change in osmolality per 1 unit increase in the predictor variable. The middle 50th percentile values for Sr were 116–336  $\mu$ g/L, for Cs were 2.38–6.66  $\mu$ g/L, and for Tl were 0.10–0.27  $\mu$ g/L.

**Table S4.** Distributions and coefficients of variation of trace elements ( $\mu$ g/L) considered in the regression analysis.

|    | <b>Median</b> | <b>25–75 %iles</b> | <b>CV</b> |
|----|---------------|--------------------|-----------|
| Co | 0.45          | 0.26–0.67          | 9.8%      |
| Zn | 287           | 131–640            | 8.0%      |
| As | 21            | 10–46              | 7.0%      |
| Se | 22            | 12–38              | 9.6%      |
| Sr | 211           | 129–297            | 5.1%      |
| Mo | 31            | 13–58              | 4.6%      |
| Cd | 0.19          | 0.08–0.37          | 6.6%      |
| Sn | 0.42          | 0.20–0.84          | 16.5%     |
| Sb | 0.09          | 0.06–0.17          | 5.3%      |
| Cs | 4.2           | 2.5–7.0            | 6.4%      |
| Ba | 2.2           | 1.3–3.7            | 33.1%     |
| Hg | 0.49          | 0.06–1.44          | 11.5%     |
| Tl | 0.17          | 0.09–0.25          | 8.9%      |
| Pb | 1.26          | 0.72–2.32          | 9.6%      |

An iCAP Q ICP-MS system (Thermo Scientific, Waltham, MA) equipped with a helium gas collision cell was used for the determination of elements as described [19,20].
